# Supplementary material for: A Global Synthesis Inversion Analysis of Recent Variability in CO 2 Fluxes Using GOSAT and In Situ Observations
Source: Copernicus journal article supplement (doi:10.5194/acp-2017-960), 2017-10-26
Supplement: Supplementary file 1 [file acp-2017-960-supplement.pdf]

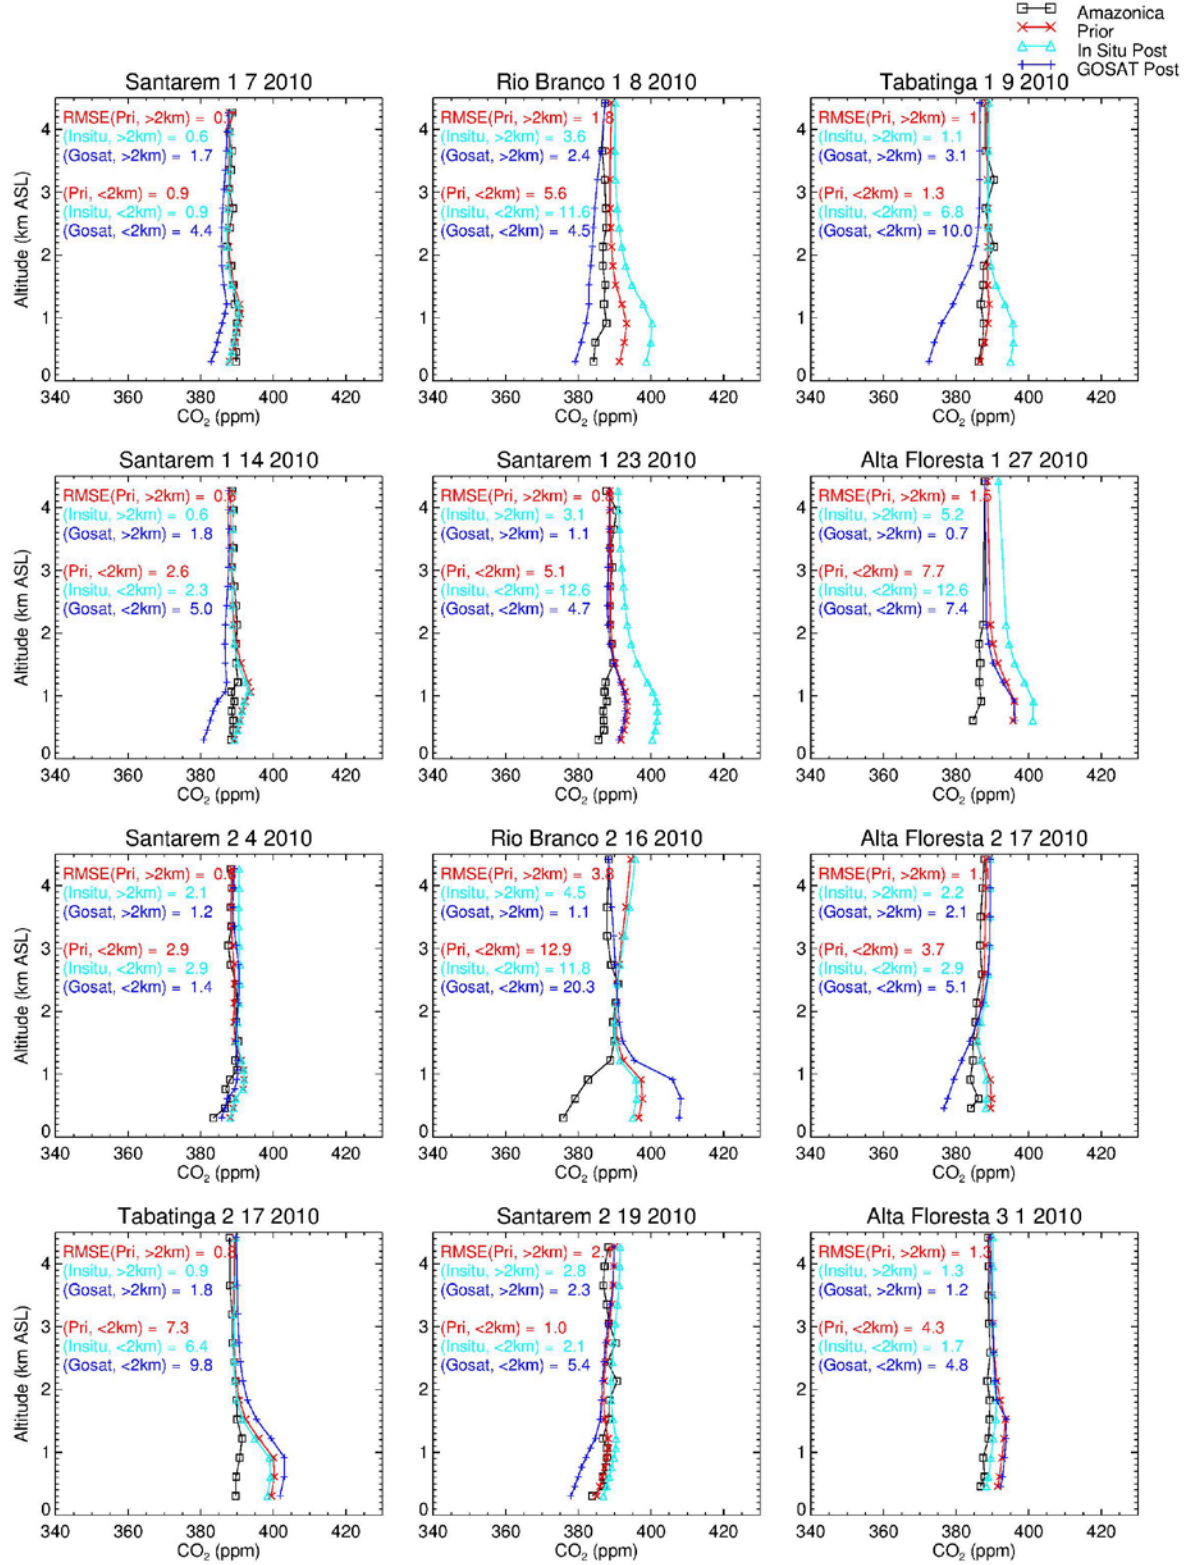

**Figure S1.** Comparison of prior, in situ-only posterior, GOSAT-only posterior, and Amazonica aircraft vertical profiles over 4 sites on different dates.

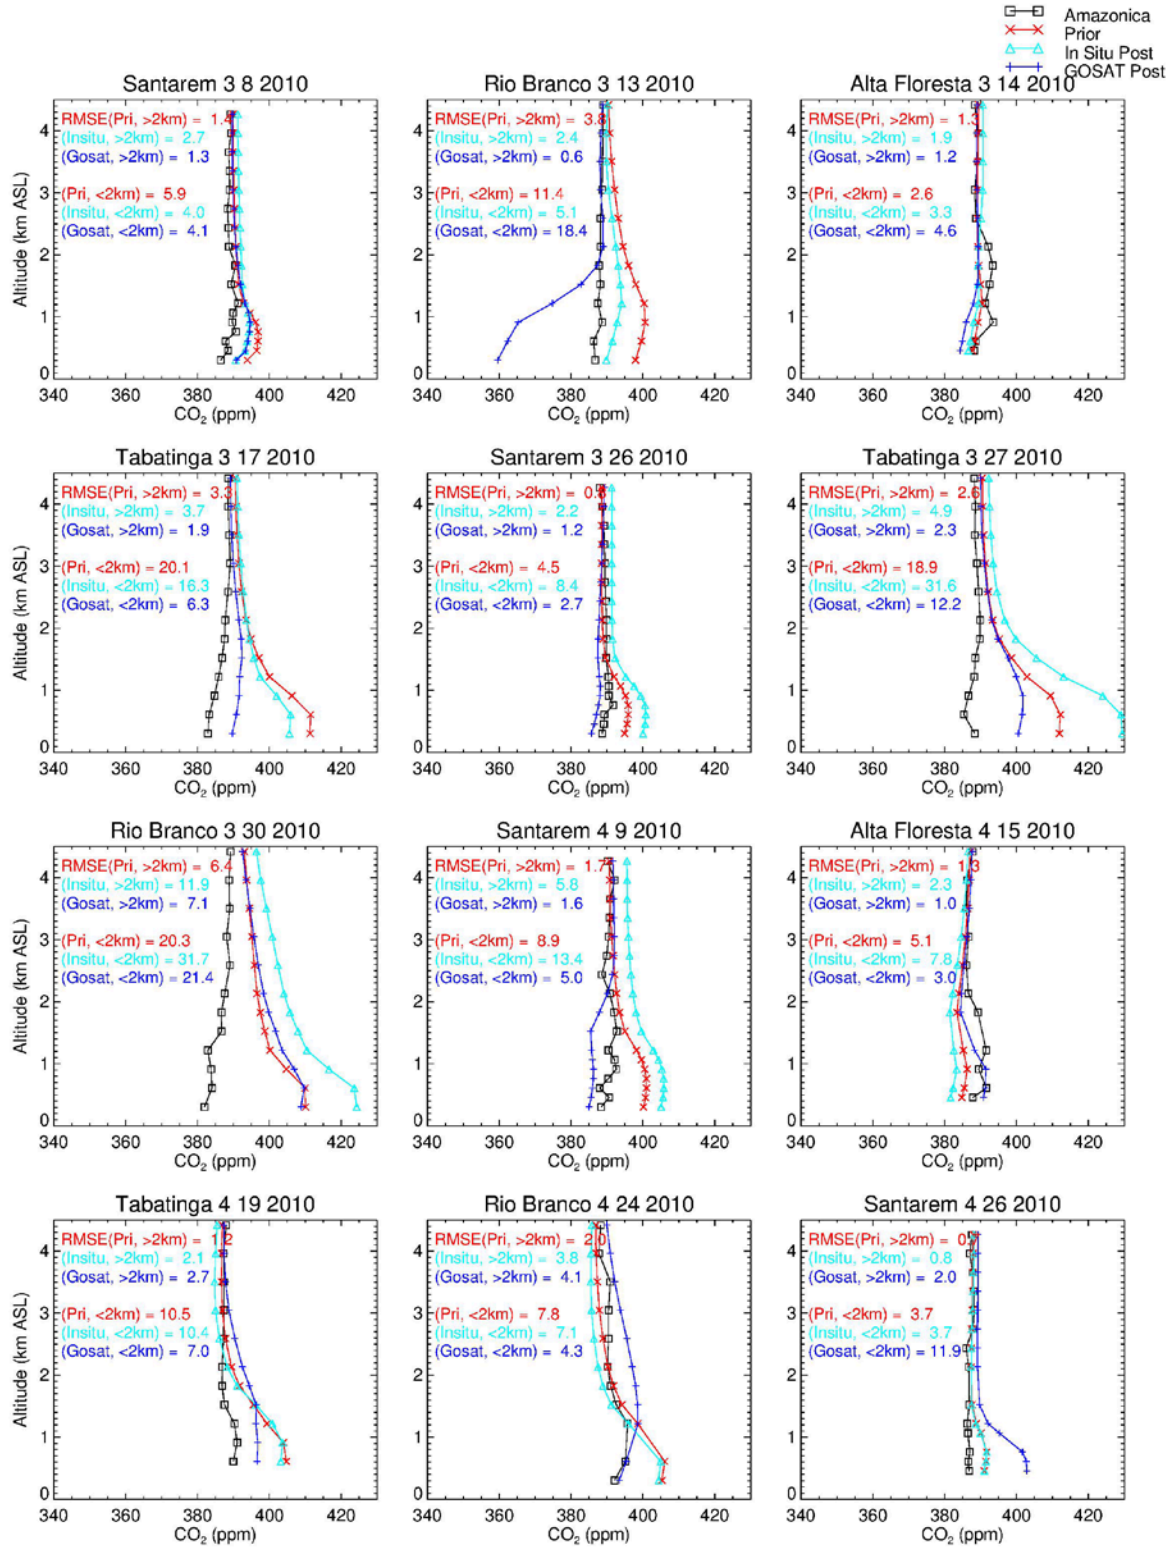

**Figure S1.** (continued)

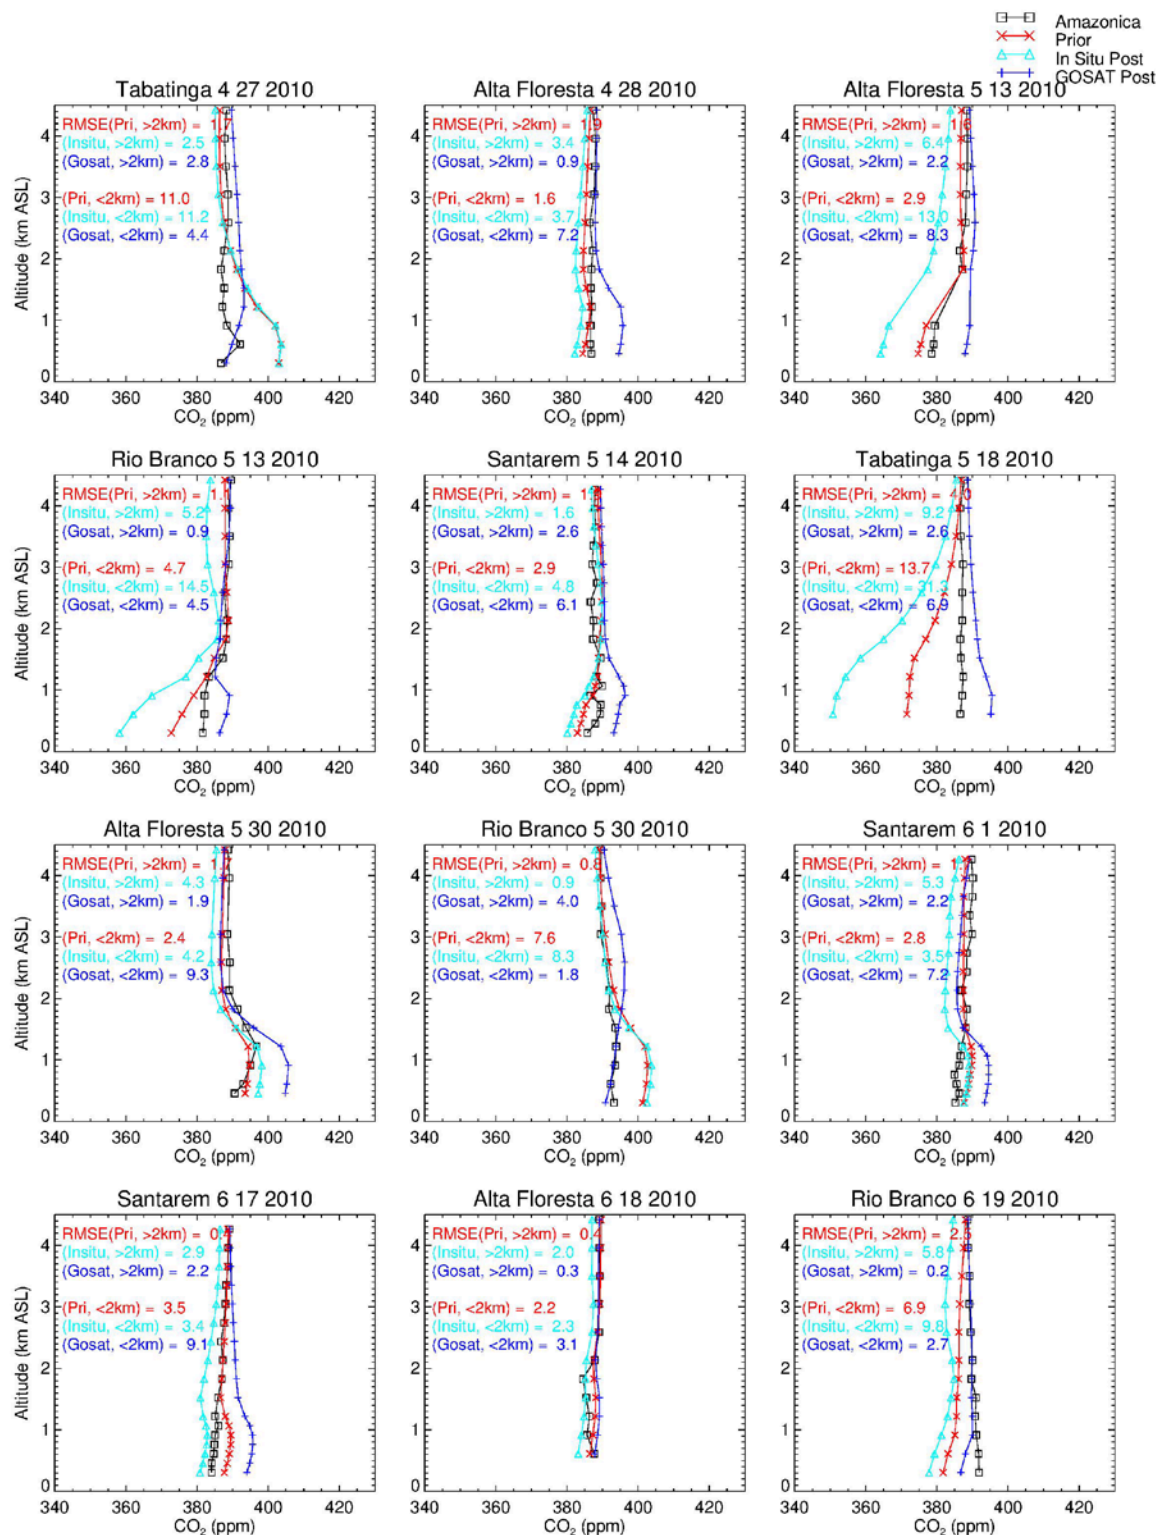

**Figure S1.** (continued)



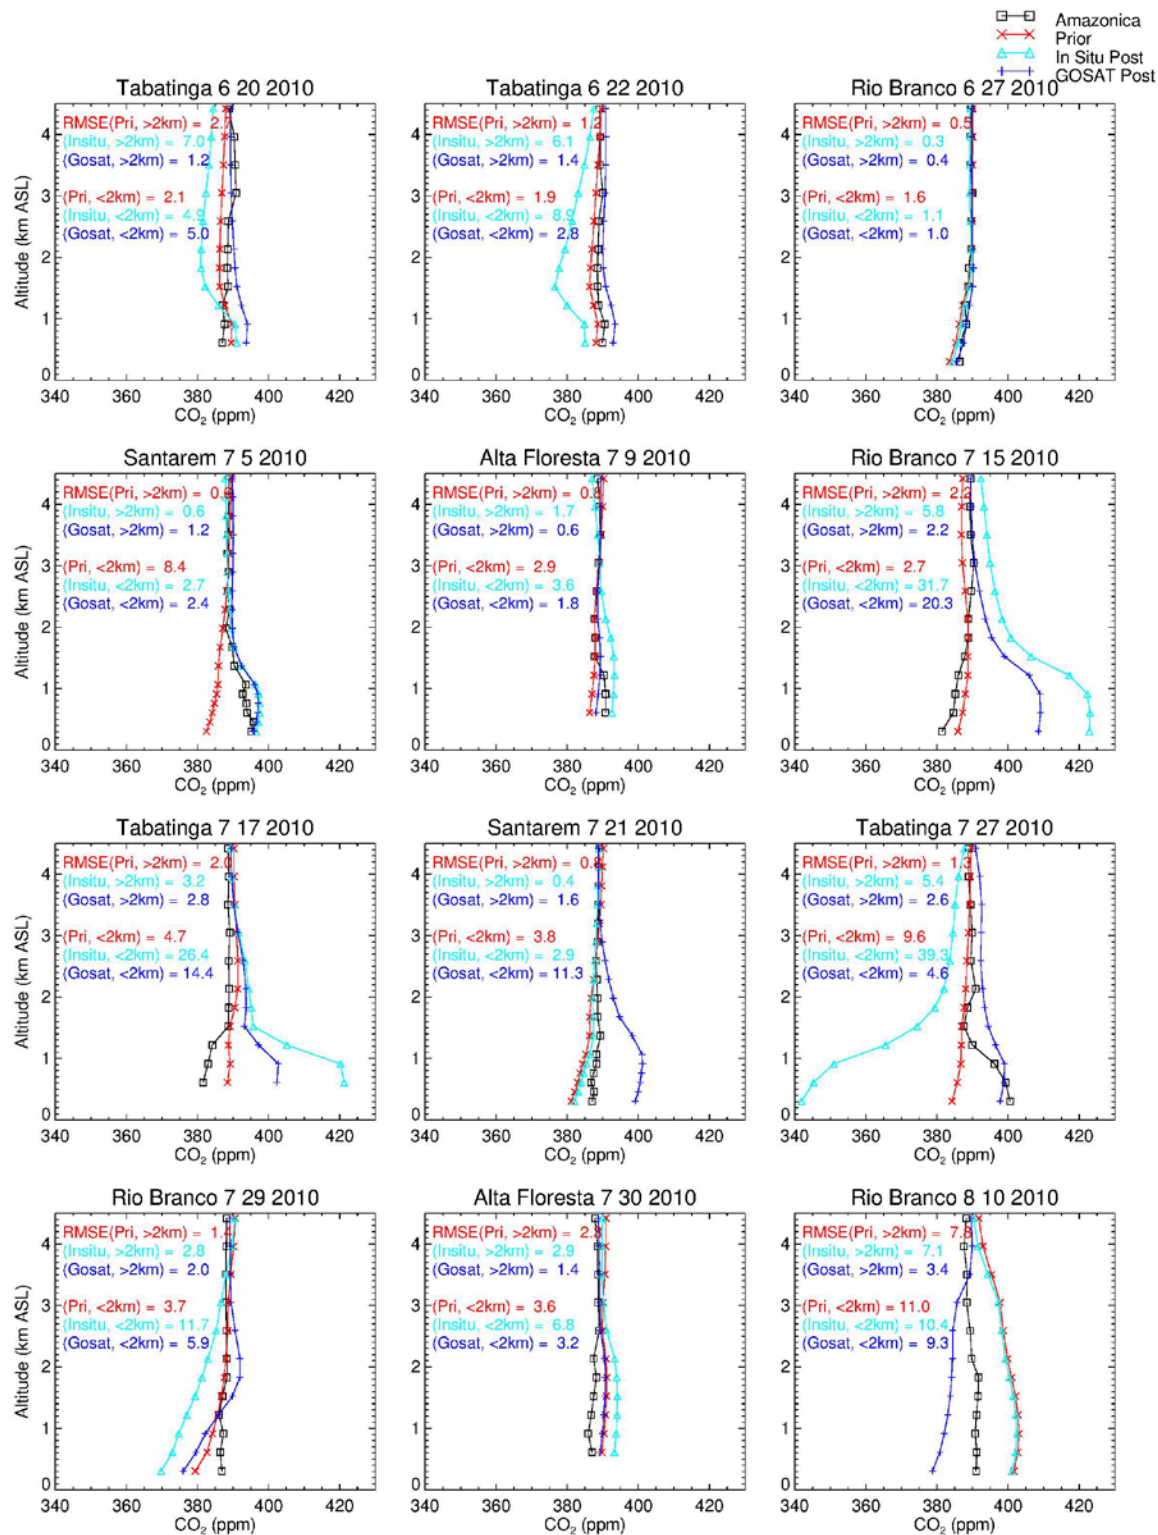

**Figure S1.** (continued)

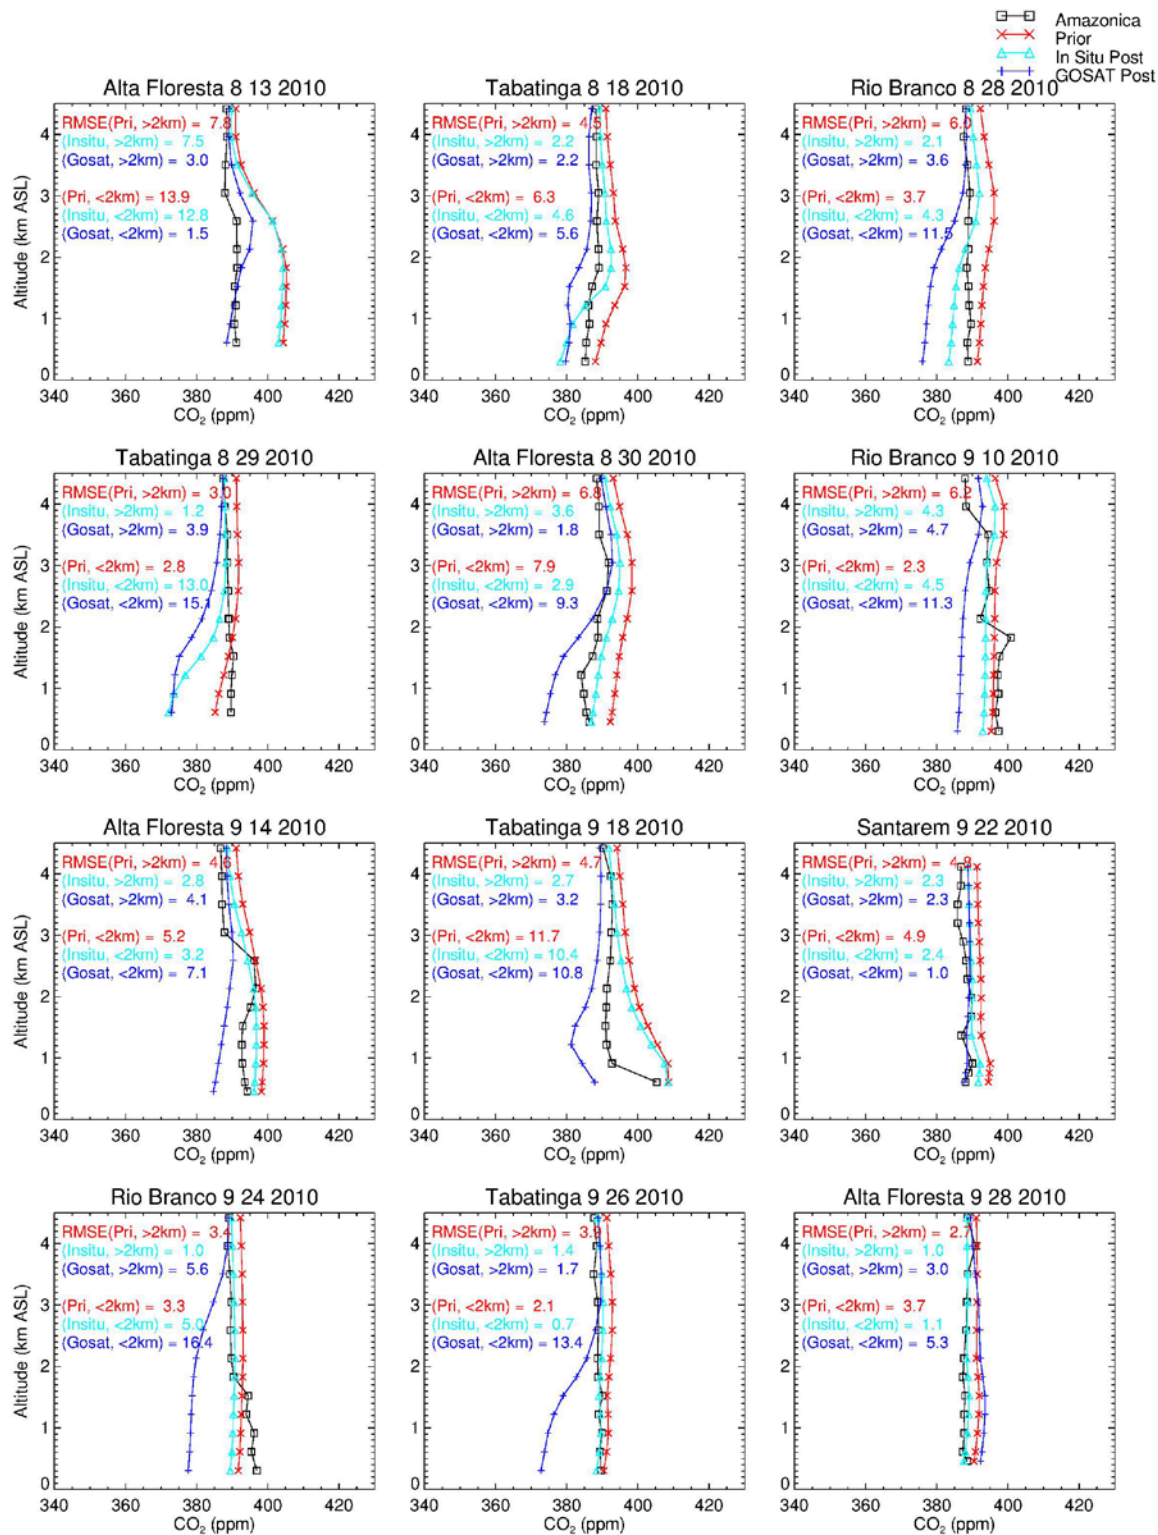

Figure S1. (continued)
